# Supplementary material for: Synthesis, structures, surface photovoltage and luminescence properties of two new nickel(ii) carboxyphosphonates with a 3D framework structure
Source: Royal Society of Chemistry journal article supplement (doi:10.1039/c4ra08424a), 2014-01-01
Supplement: c4ra08424a1.pdf [file c4ra08424a1.pdf]

# Synthesis, structures, surface photovoltage and luminescent properties of two new nickel(II) carboxyphosphonates with a 3D framework structure

Hui Luo, Yan-Yu Zhu, Zhen-Gang Sun,\* Cheng-Qi Jiao, Guang-Ning Zhang, Tong Sun, Ming-Xue Ma, and Wen-Zhu Li

## Supplementary Materials

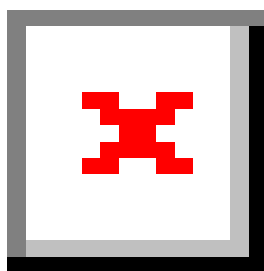

**Fig. S1** The simulated XRD pattern of compound **1** (down) and experimental powder XRD pattern of compound **1** (up)

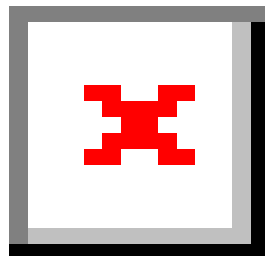

**Fig. S2** The simulated XRD pattern of compound **2** (down) and experimental powder XRD pattern of compound **2** (up)

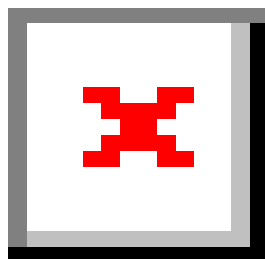

**Fig. S3** The IR spectrum of compound 1.

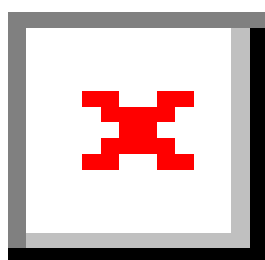

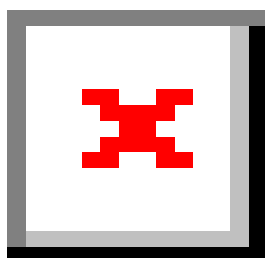

**Fig. S4** The IR spectrum of compound **2**.

**Fig. S5** The TG curve of compound **1**.

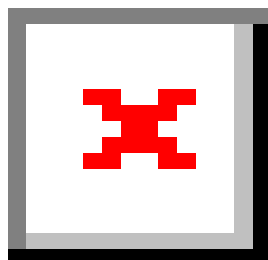

**Fig. S6** The TG curve of compound **2**.

**Fig. S7** The X-ray powder diffraction pattern of the final product in the thermal decomposition for compound **1**.

The final product is  $\text{Ni}_2\text{P}_2\text{O}_7$  (JCPDS 01-074-1604).

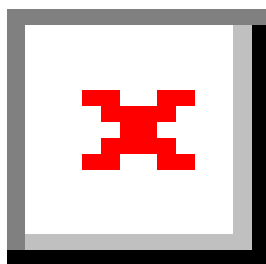

**Fig. S8** The X-ray powder

final product in

for compound **2**.

$\text{Ni}_2\text{P}_2\text{O}_7$  (JCPDS 01-074-1604).

diffraction pattern of the

the thermal decomposition

The final product is

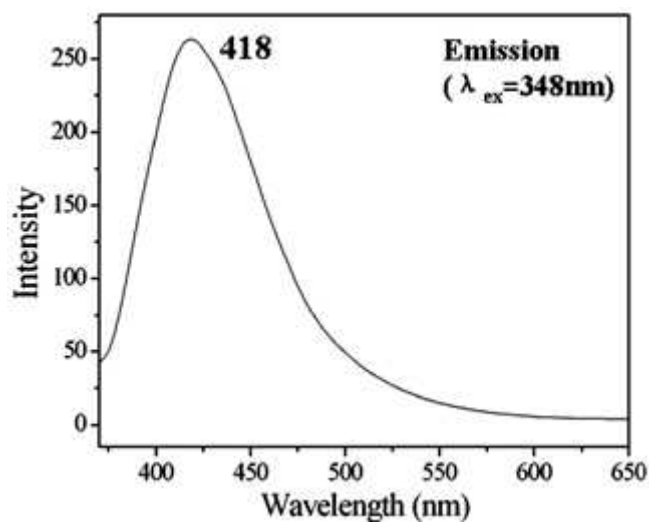

**Fig. S9** Solid-state emission spectrum of 4,4'-bipy at room temperature.

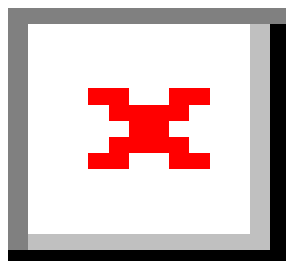

**Fig. S10** Solid-state emission spectrum of H<sub>3</sub>L at room temperature.

**Table S1** Selected bond angles (°) for compounds **1** and **2**

---

**Compound 1**

|                   |            |                    |           |
|-------------------|------------|--------------------|-----------|
| O(4)–Ni(1)–O(1)   | 91.18(13)  | O(9)–Ni(2)–O(10)#3 | 90.67(14) |
| O(4)–Ni(1)–O(3)#1 | 178.45(13) | O(2)–Ni(2)–O(10)   | 87.69(12) |

---

|                   |            |                 |          |
|-------------------|------------|-----------------|----------|
| O(8)#2–Ni(2)–N(3) | 95.9       | P(2)–O(4)–Ni(1) | 114.5(3) |
| N(3)#2–Ni(2)–N(3) | 179.75(10) |                 |          |

---

<sup>a</sup> Symmetry transformations used to generate equivalent atoms: #1  $-x + 1/2, -y + 3/2, -z$ ; #2  $-x + 1/2, y - 1/2, -z + 1/2$ ; #3  $-x + 1/2, -y + 1/2, -z$ ; #4  $-x + 1/2, y + 1/2, -z + 1/2$  for **1**; #1  $-x + 1/2, y + 1/2, -z + 1/2$ ; #2  $-x, y, -z + 1/2$ ; #3  $-x + 1/2, y - 1/2, -z + 1/2$  for **2**.
